# Supplementary material for: Reconstructed daily ground-level O&lt;sub&gt;3&lt;/sub&gt; in China over 2005–2021 for climatological, ecological, and health research
Source: Copernicus journal article supplement (doi:10.5194/essd-2022-187), 2022-06-07
Supplement: Supplementary file 1 [file essd-2022-187-supplement.pdf]

*Supplement of*

**Reconstructed daily ground-level O<sub>3</sub> in China over 2005-2021 for climatological, ecological, and health research**

**Chenhong Zhou et al.**

*Correspondence to:* Meng Gao ([mmgao2@hkbu.edu.hk](mailto:mmgao2@hkbu.edu.hk))

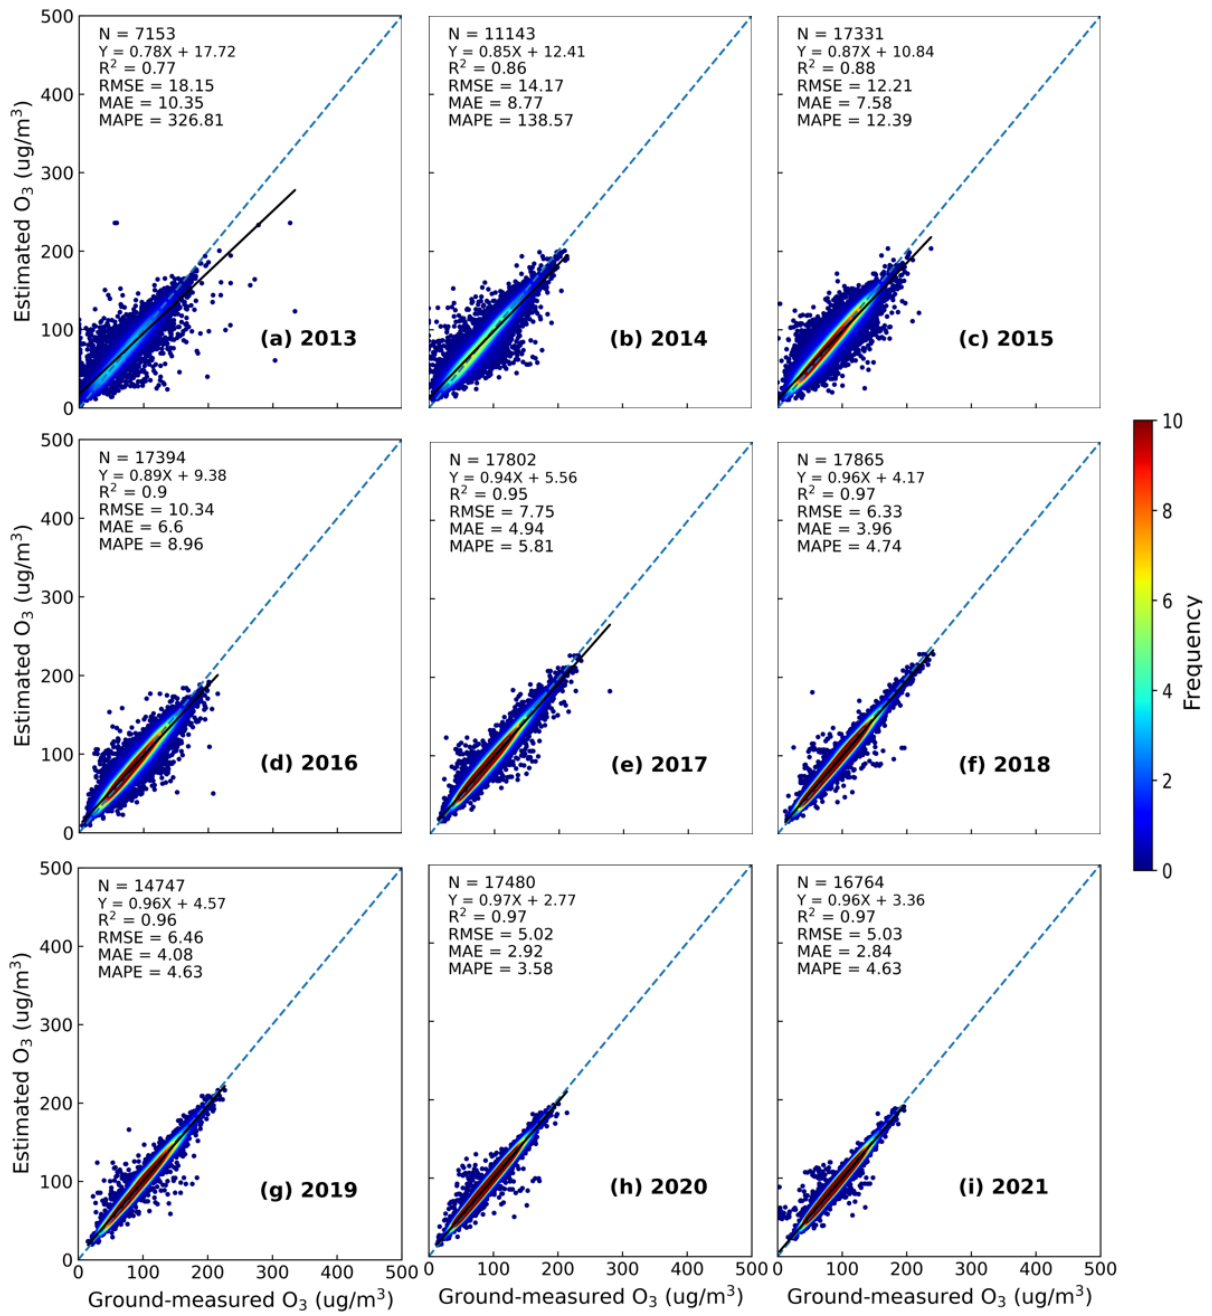

Fig. S1. Density scatterplots of monthly mean MDA8 O<sub>3</sub> concentrations for (a-i) each year from 2013 to 2021 in China.

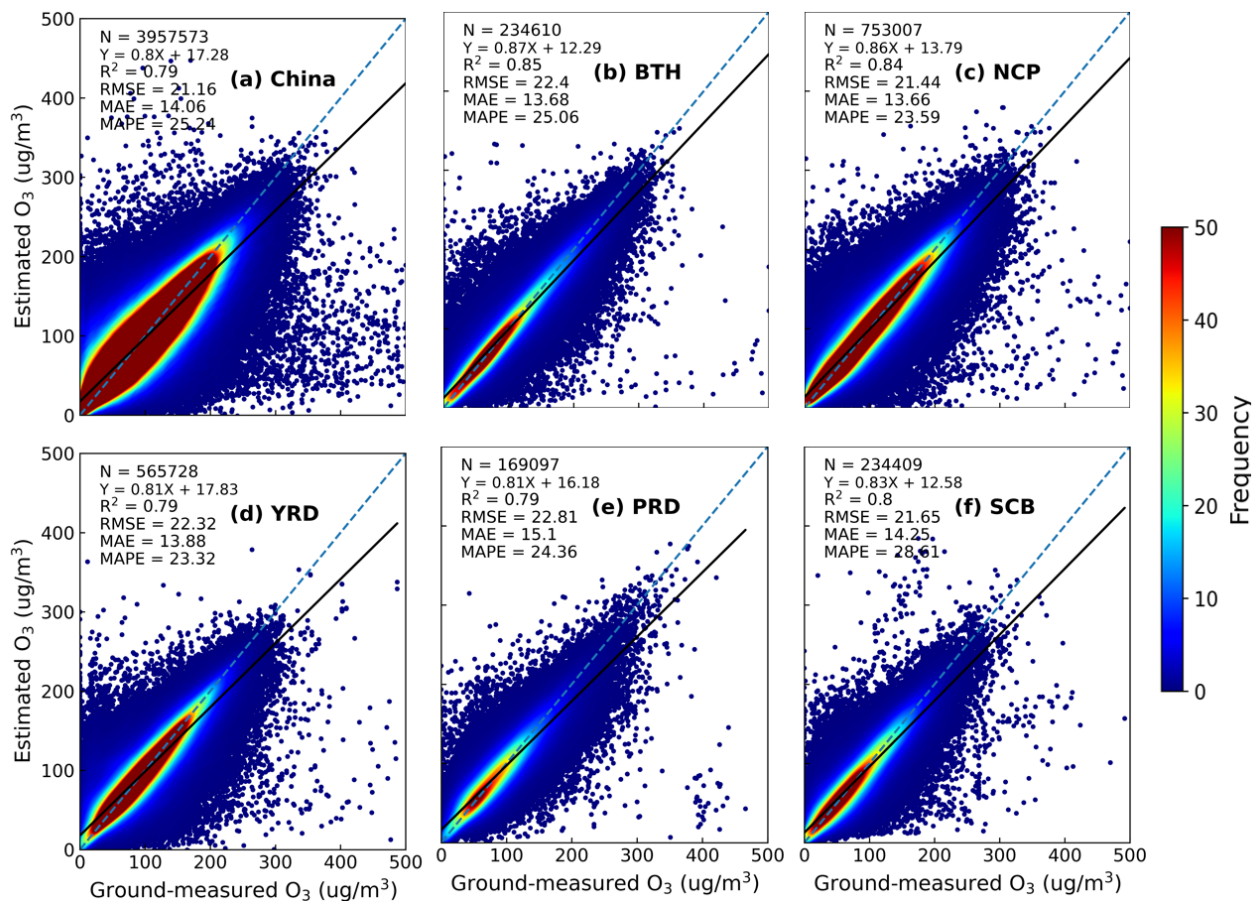

Fig. S2. Density scatterplots of the station-based cross-validation results of O<sub>3</sub> estimates from 2013 to 2021 (a) in China, (b) the Beijing-Tianjin-Hebei (BTH), (c) the North China Plain (NCP), (d) the Yangtze River Delta (YRD), (e) the Pearl River Delta (PRD), and (f) the Sichuan Basin (SCB).

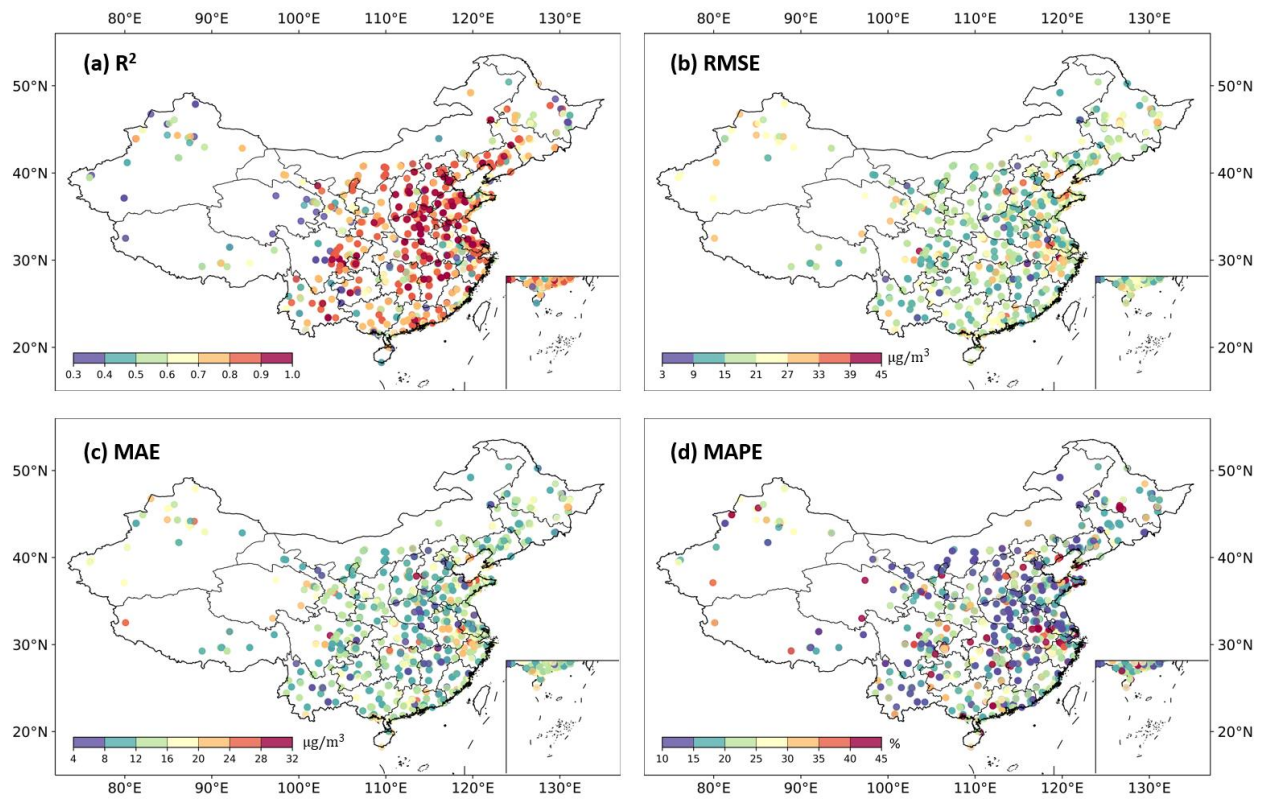

Fig. S3. Individual-station-scale station-based cross-validation results of O<sub>3</sub> estimates from 2013 to 2021 in China.

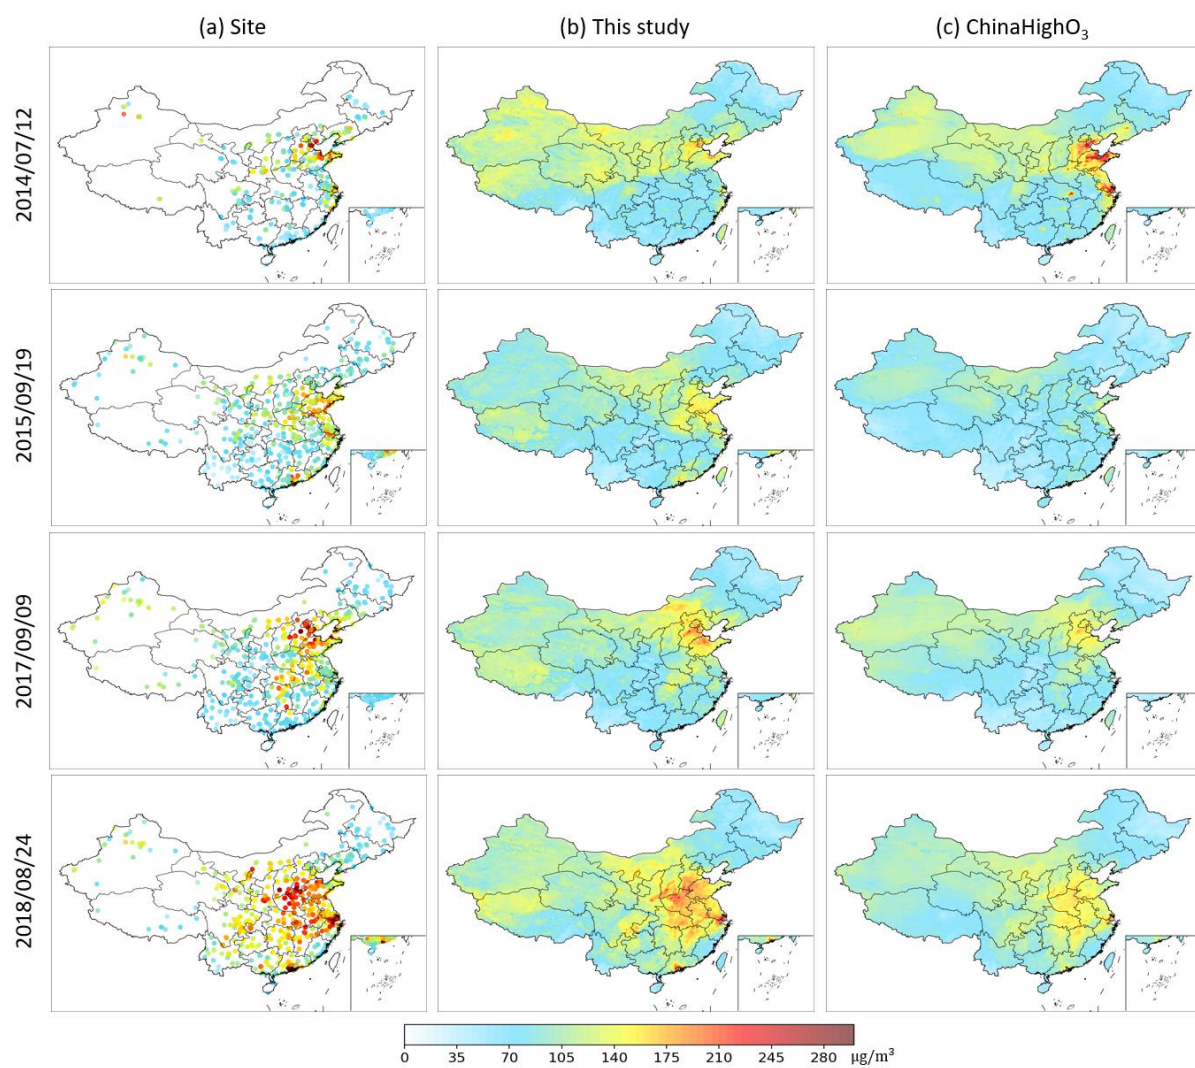

Fig. S4. Comparisons of O<sub>3</sub> distribution reconstructed by different O<sub>3</sub> concentration datasets. From the left to right column, it shows in situ O<sub>3</sub> concentration measurements (a), the O<sub>3</sub> dataset generated in this study (b), and ChinaHighO<sub>3</sub> (c), respectively. Dates are given in the format year/month/day.
